# Supplementary material for: Potential Energy Surfaces for Noble Gas (Ar, Kr, Xe, Rn)–Propylene Oxide Systems: Analytical Formulation and Binding
Source: MDPI journal article supplement (doi:10.3390/sym14020249), 2022-01-27
Supplement: s1 [file s1]

## SUPPLEMENTARY MATERIAL

### **Potential Energy Surfaces for Noble Gas (Ar, Kr, Xe, Rn) – Propylene Oxide Systems: Analytical Formulation and Binding**

Federico Palazzetti<sup>1,\*</sup>, Cecilia Coletti<sup>2</sup>, Alessandro Marrone<sup>2</sup>, Fernando Pirani<sup>1,3</sup>

<sup>1</sup>*Dipartimento di Chimica, Biologia e Biotecnologie – Università degli Studi di Perugia, Perugia, Italy*

<sup>2</sup>*Dipartimento di Farmacia, Università degli Studi “G. D’Annunzio” Chieti-Pescara, Chieti, Italy*

<sup>3</sup>*Dipartimento di Ingegneria Civile ed Ambientale, Università degli Studi di Perugia, Perugia, Italy*

\* Corresponding author: federicopalazzetti@yahoo.it

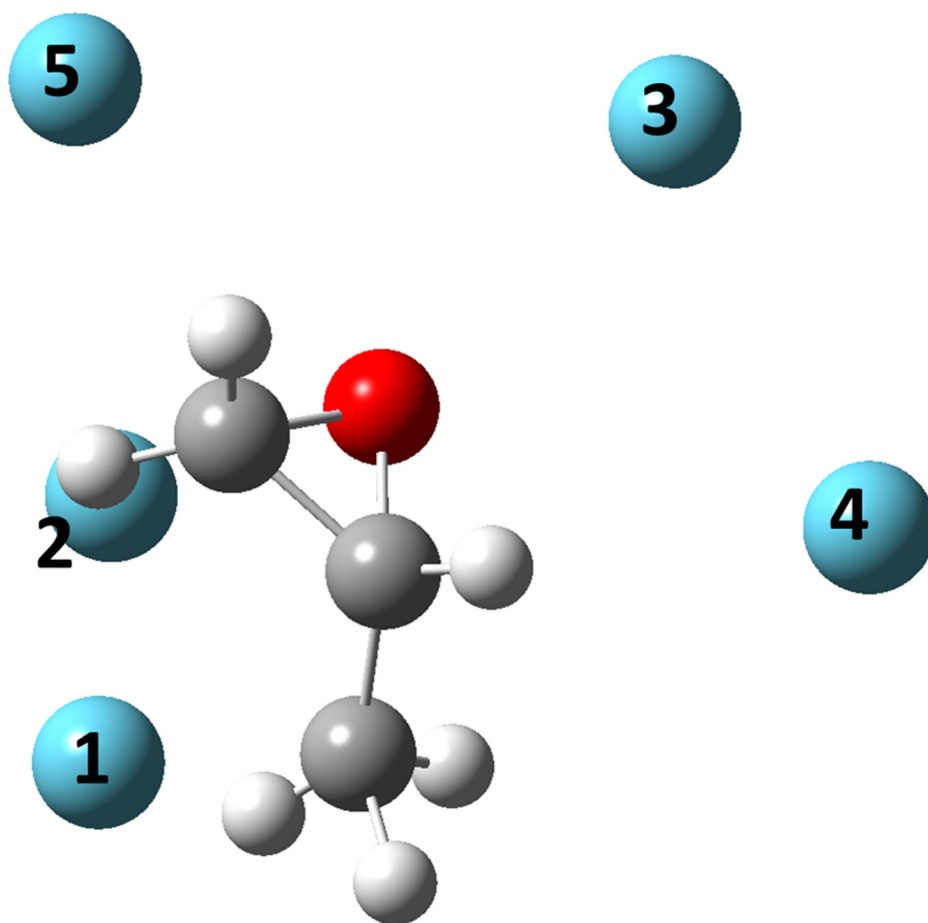

**Figure S1.** Minima geometries for Kr – propylene oxide identified on the present PES. The numbering of the Kr atom corresponds to the minima reported in Table 6.

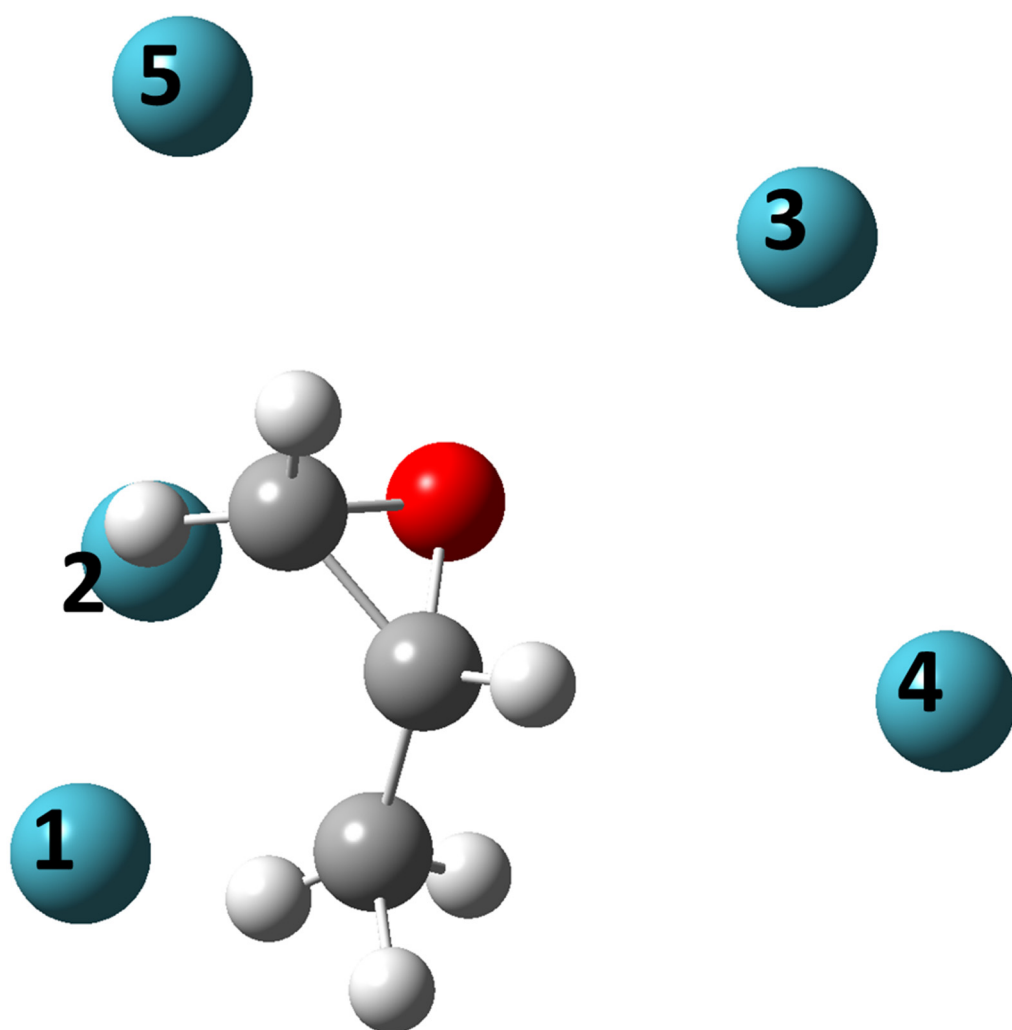

**Figure S2.** Minima geometries for Xe – propylene oxide identified on the present PES. The numbering of the Xe atom corresponds to the minima reported in Table 7.

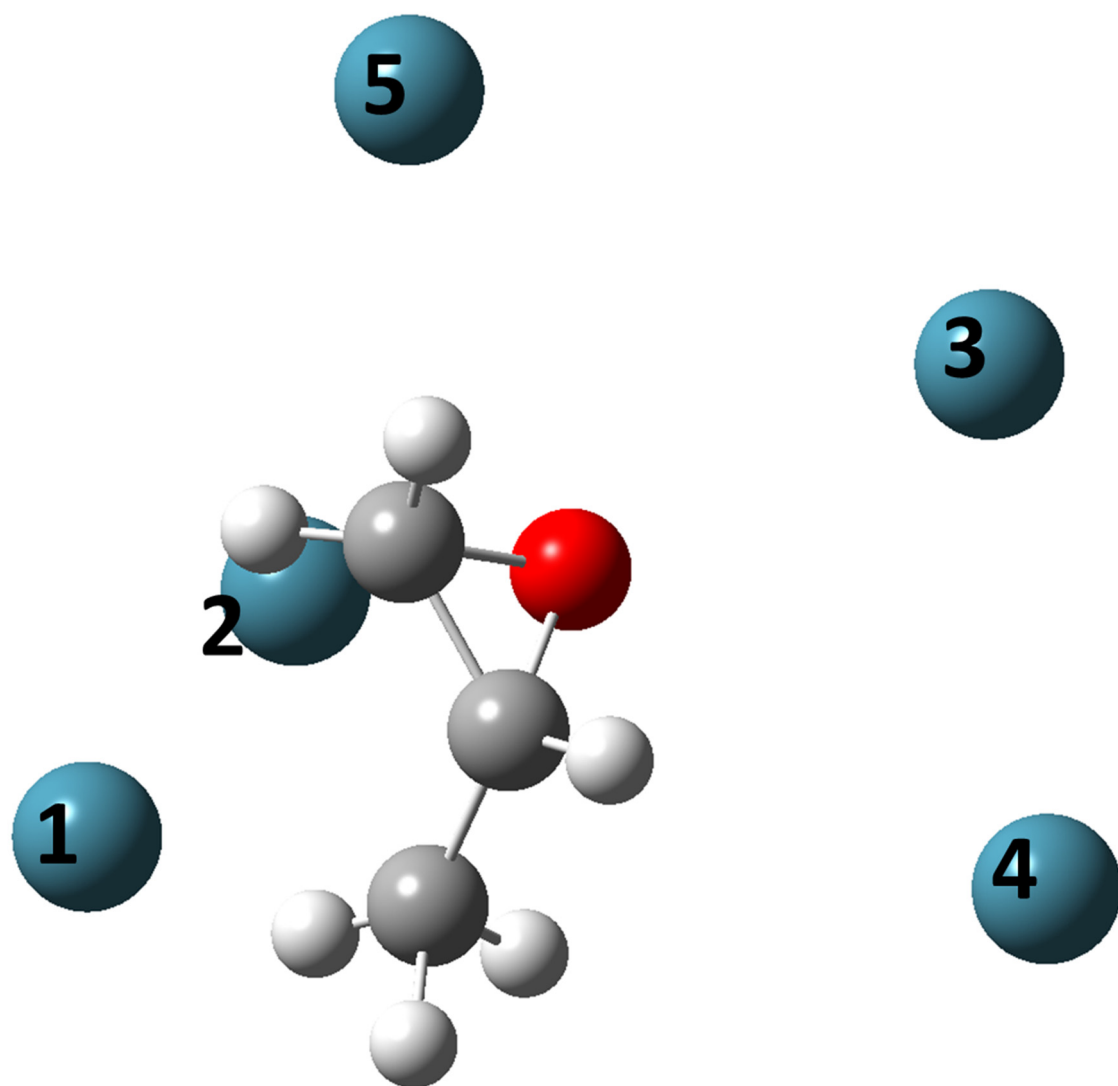

**Figure S3.** Minima geometries for Rn – propylene oxide identified on the present PES. The numbering of the Rn atom corresponds to the minima reported in Table 8.

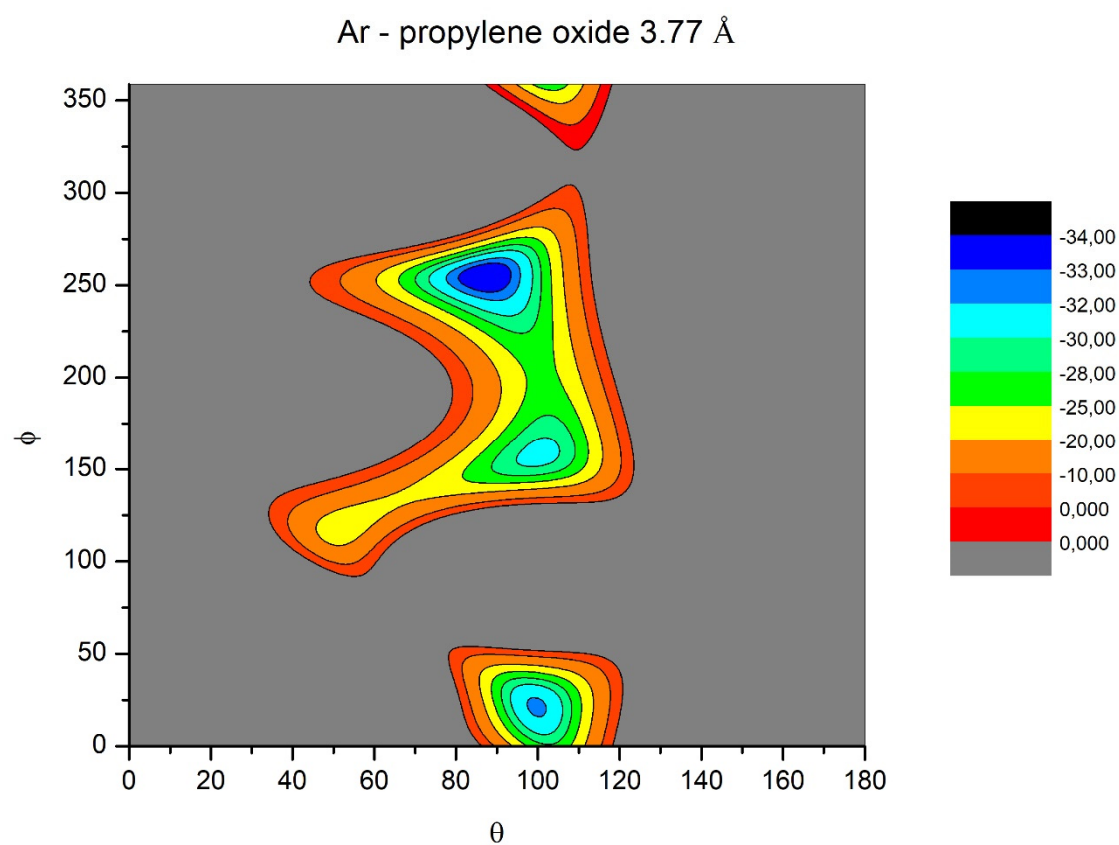

**Figure S4.** Color contour map for the Ar – propylene oxide system at  $R=3.77 \text{ Å}$  (left panel). The axes report the angles  $\theta$  and  $\phi$  in degrees, while a color scale reports the potential energy in meV.

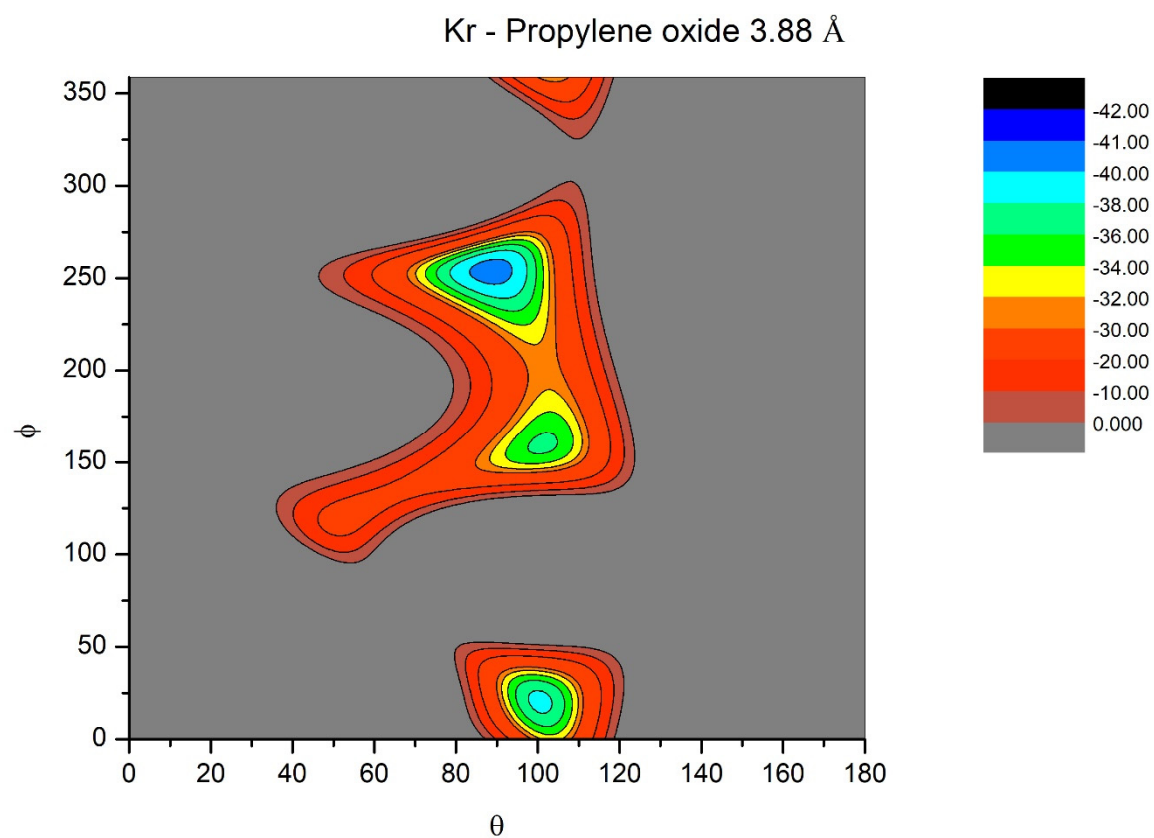

**Figure S5.** Color contour map for the Kr – propylene oxide system at  $R=3.88$  Å (left panel). The axes report the angles  $\theta$  and  $\phi$  in degrees, while a color scale reports the potential energy in meV.

**Table S1:** Binding energies for Ar-propylene oxide system calculated at different levels of theory, MP2/CBS extrapolation and CCSD(T) correction.

|       | MP2/aug-cc-pVDZ | MP2/aug-cc-pVTZ | MP2/aug-cc-pVQZ | CCSD(T)/aug-cc-pVDZ//MP2/aug-cc-pVDZ | $\Delta CCSD(T)$ | MP2/CBS | CCSD(T)/CBS |
|-------|-----------------|-----------------|-----------------|--------------------------------------|------------------|---------|-------------|
| MIN 1 | -28.2           | -35.1           | -38.2           | -31.2                                | +3.9             | -40.7   | -36.8       |
| MIN 2 | -26.0           | -33.8           | -36.8           | -31.2                                | +2.6             | -38.6   | -36.0       |
| MIN 3 | -28.2           | -36.9           | -40.3           | -34.7                                | +2.2             | -42.4   | -40.2       |
| MIN 4 | -31.2           | -39.8           | -43.3           | -34.7                                | +5.1             | -45.4   | -40.3       |
| MIN 5 | -24.7           | -31.7           | -34.7           | -28.2                                | +3.5             | -36.5   | -33.0       |

**Table S2:** Binding energies for Kr-propylene oxide system calculated at different levels of theory, MP2/CBS extrapolation and CCSD(T) correction.

|       | MP2/aug-cc-pVDZ | MP2/aug-cc-pVTZ | MP2/aug-cc-pVQZ | CCSD(T)/aug-cc-pVDZ//MP2/aug-cc-pVDZ | $\Delta CCSD(T)$ | MP2/CBS | CCSD(T)/CBS |
|-------|-----------------|-----------------|-----------------|--------------------------------------|------------------|---------|-------------|
| MIN 1 | -34.3           | -44.7           | -48.6           | -38.0                                | +6.7             | -50.9   | -44.2       |
| MIN 2 | -32.5           | -43.4           | -47.3           | -38.6                                | +4.8             | -49.4   | -44.6       |
| MIN 3 | -38.0           | -49.9           | -54.6           | -41.6                                | +8.3             | -57.5   | -49.2       |
| MIN 4 | -34.7           | -46.8           | -51.2           | -42.0                                | +4.8             | -53.8   | -49.0       |
| MIN 5 | -30.4           | -39.9           | -43.4           | -34.3                                | +5.6             | -45.4   | -39.8       |

**Table S3:** Binding energies for Xe-propylene oxide system calculated at different levels of theory, MP2/CBS extrapolation and CCSD(T) correction.

|       | MP2/aug-cc-pVDZ | MP2/aug-cc-pVTZ | MP2/aug-cc-pVQZ | CCSD(T)/aug-cc-pVDZ//MP2/aug-cc-pVDZ | $\Delta CCSD(T)$ | MP2/CBS | CCSD(T)/CBS |
|-------|-----------------|-----------------|-----------------|--------------------------------------|------------------|---------|-------------|
| MIN 1 | -39.9           | -54.2           | -59.8           | -44.2                                | +10.0            | -63.2   | -53.2       |
| MIN 2 | -38.2           | -53.3           | -59.4           | -45.5                                | +7.8             | -63.0   | -55.2       |
| MIN 3 | -40.8           | -57.2           | -63.7           | -49.9                                | +7.3             | -67.5   | -60.2       |
| MIN 4 | -42.9           | -59.8           | -67.8           | -48.6                                | +11.2            | -70.9   | -59.7       |
| MIN 5 | -35.1           | -49.0           | -54.6           | -40.3                                | +8.7             | -57.9   | -49.2       |

**Table S4:** Binding energies for Rn-propylene oxide system calculated at different levels of theory, MP2/CBS extrapolation and CCSD(T) correction.

|       | MP2/aug-cc-pVDZ | MP2/aug-cc-pVTZ | MP2/aug-cc-pVQZ | CCSD(T)/aug-cc-pVDZ//MP2/aug-cc-pVDZ | $\Delta CCSD(T)$ | MP2/CBS | CCSD(T)/CBS |
|-------|-----------------|-----------------|-----------------|--------------------------------------|------------------|---------|-------------|
| MIN 1 | -41.6           | -59.8           | -67.2           | -48.1                                | +11.7            | -71.6   | -59.9       |
| MIN 2 | -40.8           | -59.4           | -67.2           | -50.3                                | +9.1             | -71.8   | -63.7       |
| MIN 3 | -45.1           | -65.9           | -74.1           | -52.7                                | +11.4            | -79.0   | -67.6       |
| MIN 4 | -42.9           | -63.3           | -71.6           | -53.8                                | +9.3             | -76.4   | -67.1       |
| MIN 5 | -49.0           | -54.2           | -61.1           | -43.8                                | +10.4            | -65.6   | -55.2       |
